# Supplementary material for: A comparison of the microbiology profile for periprosthetic joint infection of knee arthroplasty and lower-limb endoprostheses in tumour surgery
Source: Copernicus journal article supplement (doi:10.5194/jbji-7-177-2022), 2022-08-08
Supplement: Supplementary file [file jbji-7-177-2022-supplement.pdf]

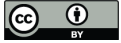

*Supplement of*

## **A comparison of the microbiology profile for periprosthetic joint infection of knee arthroplasty and lower-limb endoprostheses in tumour surgery**

**Robert A. McCulloch et al.**

*Correspondence to:* Robert A. McCulloch ([robert.mcculloch@nhs.net](mailto:robert.mcculloch@nhs.net))

The copyright of individual parts of the supplement might differ from the article licence.

Table S1. A chronological summary of cultured organisms during the study period

| Count       |                                   | PrimaryKnee_Endoprosthesis |                    |       |
|-------------|-----------------------------------|----------------------------|--------------------|-------|
|             |                                   | Primary Knee               | Endoprosthe<br>sis | Total |
| Micro_Chart | Alpha haemolytic streptococcus    | 1                          | 2                  | 3     |
|             | Arcano. Haemolyticum              | 1                          | 0                  | 1     |
|             | Beta haemolytic streptococcus     | 4                          | 7                  | 11    |
|             | Coagulase negative staphylococcus | 36                         | 23                 | 59    |
|             | Corynebacterium sp                | 2                          | 2                  | 4     |
|             | Cutibacterium sp                  | 3                          | 0                  | 3     |
|             | Enterobacter sp                   | 2                          | 1                  | 3     |
|             | Enterococcus sp                   | 4                          | 2                  | 6     |
|             | Escherichia coli                  | 3                          | 2                  | 5     |
|             | Finegoldia magna                  | 1                          | 0                  | 1     |
|             | Fungal                            | 1                          | 0                  | 1     |
|             | Granulicatella adiacens           | 0                          | 1                  | 1     |
|             | Klebsiella sp                     | 0                          | 1                  | 1     |
|             | Kocuria kristinae                 | 1                          | 0                  | 1     |
|             | Morganella morganii               | 2                          | 0                  | 2     |
|             | MRSA                              | 0                          | 1                  | 1     |
|             | Mycobacteria sp                   | 1                          | 0                  | 1     |
|             | Negative Culture                  | 6                          | 4                  | 10    |
|             | Pseudomonas sp                    | 2                          | 0                  | 2     |
|             | Serratia sp                       | 1                          | 1                  | 2     |
|             | Staphylococcus aureus             | 16                         | 7                  | 23    |
|             | VRE                               | 0                          | 1                  | 1     |
| Total       |                                   | 87                         | 55                 | 142   |
